# Supplementary material for: Simple and Sensitive Analysis of Clenbuterol in Urine Matrices by UHPLC-MS/MS Method with Online-SPE Sample Preparation
Source: MDPI journal article supplement (doi:10.3390/separations9120440), 2022-12-14
Supplement: s1 [file s1]

## Article

# Simple and Sensitive Analysis of Clenbuterol in Urine Matrices by UHPLC-MS/MS Method with Online-SPE Sample Preparation

Kristián Slíž<sup>1,2</sup>, Dominika Olešová<sup>3</sup>, Juraj Piešťanský<sup>2,4</sup> and Peter Mikuš<sup>1,2,\*</sup>

<sup>1</sup> Comenius University Bratislava, Faculty of Pharmacy, Department of Pharmaceutical Analysis and Nuclear Pharmacy, Odbojárov 10, 832 32 Bratislava, Slovakia; kristian.sliz@uniba.sk

<sup>2</sup> Comenius University Bratislava, Faculty of Pharmacy, Toxicologic and Antidoping Centre, Odbojárov 10, 832 32 Bratislava, Slovakia; piestansky@fpharm.uniba.sk

<sup>3</sup> Slovak Academy of Sciences, Biomedical Research Center, Institute of Experimental Endocrinology, Dúbravská cesta 9, 845 45 Bratislava, Slovakia; dominika.olesova@savba.sk

<sup>4</sup> Comenius University Bratislava, Faculty of Pharmacy, Department of Galenic Pharmacy, Odbojárov 10, 832 32 Bratislava, Slovakia

\* Correspondence: mikus@fpharm.uniba.sk; Tel.: +421-2-50-117-243

## Supplementary Material

**Citation:** Lastname, F.; Lastname, F.; Lastname, F. Title. *Separations* **2022**, *9*, 440. <https://doi.org/10.3390/separations9120440>

Academic Editor: Firstname Lastname

Received: date

Accepted: date

Published: 14 December 2022

**Publisher's Note:** MDPI stays neutral with regard to jurisdictional claims in published maps and institutional affiliations.

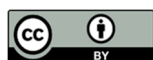

**Copyright:** © 2022 by the authors. Licensee MDPI, Basel, Switzerland. This article is an open access article distributed under the terms and conditions of the Creative Commons Attribution (CC BY) license (<https://creativecommons.org/licenses/by/4.0/>).

## Table of Contents

**Table S1.** Gradient of the mobile phase and positions of the switching valve in the SPE–UHPLC–MS/MS method.

**Table S2.** Recovery and matrix effect of the developed SPE–UHPLC–MS/MS method from the analysis of QC samples in Surine™.

**Table S3.** Recovery and matrix effect of the developed SPE–UHPLC–MS/MS method from the analysis of QC samples in pooled urine.

**Table S4.** Stability of clenbuterol from the analysis of QC samples in pooled urine.

**Table S5.** Comparison of retention time of two MRM transitions for blinded samples in Surine™.

**Table S6.** Relative abundances of two MRM transitions for blinded samples in Surine™.

**Table S7.** Comparison of retention time of two MRM transitions for blinded samples in urine.

**Table S8.** Relative abundances of two MRM transitions for blinded samples in urine.

**Table S9.** Precision and accuracy of the developed SPE–UHPLC–MS/MS method from analysis of blinded samples in Surine™.

**Table S10.** Precision and accuracy of the developed SPE–UHPLC–MS/MS method from analysis of blinded samples in urine.

**Table S1.** Gradient of the mobile phase and positions of the switching valve in the SPE–UHPLC–MS/MS method.

| t [min] | Solvent B [%] | Valve Position | Process                |
|---------|---------------|----------------|------------------------|
| 0.00    | 5             | 1              | loading & washing      |
| 6.00    | 5             | 2              | separating & measuring |
| 6.50    | 5             | 2              |                        |
| 11.00   | 95            | 2              |                        |
| 13.00   | 95            | 2              |                        |
| 13.01   | 5             | 2              | re-equilibrating       |
| 17.00   | 5             | 1              |                        |
| 20.00   | 5             | 1              |                        |

Solvent B—methanol

**Table S2.** Recovery and matrix effect of the developed SPE–UHPLC–MS/MS method from the analysis of QC samples in Surine™.

| Nominal<br>[ng/mL] | Found<br>[ng/mL] | Recovery [%],<br>n = 5 | Matrix effect<br>without IS [%],<br>n = 5 | Matrix effect<br>with IS [%],<br>n = 5 |
|--------------------|------------------|------------------------|-------------------------------------------|----------------------------------------|
| 0.5                | 0.45             | 101.56                 | 15.84                                     | 1.56                                   |
| 2.5                | 2.35             | 106.82                 | 15.35                                     | 6.82                                   |
| 25                 | 23.64            | 100.18                 | -10.53                                    | -0.18                                  |

IS—internal standard

**Table S3.** Recovery and matrix effect of the developed SPE–UHPLC–MS/MS method from the analysis of QC samples in pooled urine.

| Nominal<br>[ng/mL] | Found<br>[ng/mL] | Recovery [%],<br>n = 5 | Matrix effect<br>without IS [%],<br>n = 5 | Matrix effect<br>with IS [%],<br>n = 5 |
|--------------------|------------------|------------------------|-------------------------------------------|----------------------------------------|
| 0.5                | 0.47             | 106.08                 | 23.04                                     | 6.08                                   |
| 2.5                | 2.47             | 112.28                 | 20.67                                     | 12.28                                  |
| 25                 | 23.77            | 100.73                 | -0.44                                     | 0.73                                   |

IS—internal standard

**Table S4.** Stability of clenbuterol from the analysis of QC samples in pooled urine.

| Conditions                                                       | Nominal<br>[ng/mL] | Found<br>[ng/mL] | Recovery [%],<br>n = 5 |
|------------------------------------------------------------------|--------------------|------------------|------------------------|
| Autosampler stability in urine<br>at 8°C after 24 h              | 0.5                | 0.47             | 98.09                  |
|                                                                  | 2.5                | 2.41             | 98.05                  |
|                                                                  | 25                 | 25.66            | 97.67                  |
| Freeze–thaw stability in urine<br>(-80°C, after the third cycle) | 0.5                | 0.47             | 98.68                  |
|                                                                  | 2.5                | 2.36             | 95.94                  |
|                                                                  | 25                 | 25.86            | 98.40                  |
| Benchtop stability in urine<br>after 24 h                        | 0.5                | 0.47             | 97.35                  |
|                                                                  | 2.5                | 2.46             | 100.24                 |
|                                                                  | 25                 | 26.44            | 100.63                 |

**Table S5.** Comparison of retention time of two MRM transitions for blinded samples in Surine™.

| Blinded sample | Retention time IS [min] |           | Retention time analyte [min] |           | Difference [%]<br>Max. tolerated: 0.5% |
|----------------|-------------------------|-----------|------------------------------|-----------|----------------------------------------|
|                | <i>n</i> = 3            |           | <i>n</i> = 3                 |           |                                        |
|                | Sample                  | Reference | Sample                       | Reference |                                        |
| 1              | 9.516                   | 9.526     | 9.537                        | 9.545     | 0.09                                   |
| 2              | 9.480                   | 9.526     | 9.499                        | 9.545     | 0.49                                   |
| 3              | 9.486                   | 9.526     | 9.506                        | 9.545     | 0.44                                   |
| 4              | 9.513                   | 9.526     | 9.534                        | 9.545     | 0.13                                   |
| 5              | 9.488                   | 9.526     | 9.508                        | 9.545     | 0.39                                   |
| 6              | 9.485                   | 9.526     | 9.496                        | 9.545     | 0.40                                   |
| 7              | 9.482                   | 9.526     | 9.502                        | 9.545     | 0.45                                   |
| 8              | 9.518                   | 9.526     | 9.539                        | 9.545     | 0.07                                   |
| 9              | 9.487                   | 9.526     | 9.497                        | 9.545     | 0.45                                   |
| 10             | 9.483                   | 9.526     | 9.503                        | 9.545     | 0.44                                   |

IS—internal standard

**Table S6.** Relative abundances of two MRM transitions for blinded samples in Surine™.

| Blinded sample | Transition<br>[ <i>m/z</i> ] = 277 | Relative abundance [%] |           | Difference [%] | Max. toler-<br>ated: Win-<br>dow<br>±5<br>(ref-<br>er-<br>ence) |
|----------------|------------------------------------|------------------------|-----------|----------------|-----------------------------------------------------------------|
|                |                                    | <i>n</i> = 3           |           |                |                                                                 |
|                |                                    | Sample                 | Reference |                |                                                                 |
| 1              | → 203                              | 100                    | 100       | 0.96           | >0–                                                             |
|                | → 132.1                            | 5.59                   | 4.63      |                | 9.63%                                                           |
| 2              | → 203                              | 100                    | 100       | 0.65           | >0–                                                             |
|                | → 132.1                            | 5.28                   | 4.63      |                | 9.63%                                                           |
| 3              | → 203                              | 100                    | 100       | 0.32           | >0–                                                             |
|                | → 132.1                            | 4.95                   | 4.63      |                | 9.63%                                                           |
| 4              | → 203                              | 100                    | 100       | 0.98           | >0–                                                             |
|                | → 132.1                            | 5.61                   | 4.63      |                | 9.63%                                                           |
| 5              | → 203                              | 100                    | 100       | 0.18           | >0–                                                             |
|                | → 132.1                            | 4.81                   | 4.63      |                | 9.63%                                                           |
| 6              | → 203                              | 100                    | 100       | 0.54           | >0–                                                             |
|                | → 132.1                            | 5.17                   | 4.63      |                | 9.63%                                                           |
| 7              | → 203                              | 100                    | 100       | 0.67           | >0–                                                             |
|                | → 132.1                            | 5.3                    | 4.63      |                | 9.63%                                                           |
| 8              | → 203                              | 100                    | 100       | 1.35           | >0–                                                             |
|                | → 132.1                            | 5.98                   | 4.63      |                | 9.63%                                                           |
| 9              | → 203                              | 100                    | 100       | 0.68           | >0–                                                             |
|                | → 132.1                            | 5.31                   | 4.63      |                | 9.63%                                                           |
| 10             | → 203                              | 100                    | 100       | 0.92           | >0–                                                             |
|                | → 132.1                            | 5.55                   | 4.63      |                | 9.63%                                                           |

**Table S7.** Comparison of retention time of two MRM transitions for blinded samples in urine.

| Blinded sample | Retention time IS [min] |           | Retention time analyte [min] |           | Difference<br>Max. tolerated: 0.5% |
|----------------|-------------------------|-----------|------------------------------|-----------|------------------------------------|
|                | <i>n</i> = 3            |           | <i>n</i> = 3                 |           |                                    |
|                | Sample                  | Reference | Sample                       | Reference |                                    |
| 1              | 9.509                   | 9.526     | 9.527                        | 9.545     | 0.18                               |
| 2              | 9.549                   | 9.526     | 9.525                        | 9.545     | 0.23                               |
| 3              | 9.542                   | 9.526     | 9.568                        | 9.545     | 0.21                               |
| 4              | 9.516                   | 9.526     | 9.536                        | 9.545     | 0.10                               |
| 5              | 9.571                   | 9.526     | 9.539                        | 9.545     | 0.26                               |
| 6              | 9.545                   | 9.526     | 9.565                        | 9.545     | 0.21                               |
| 7              | 9.534                   | 9.526     | 9.554                        | 9.545     | 0.09                               |
| 8              | 9.581                   | 9.526     | 9.512                        | 9.545     | 0.46                               |
| 9              | 9.519                   | 9.526     | 9.541                        | 9.545     | 0.06                               |
| 10             | 9.524                   | 9.526     | 9.527                        | 9.545     | 0.11                               |

IS—internal standard

**Table S8.** Relative abundances of two MRM transitions for blinded samples in urine.

| Blinded sample | Transition<br>[ <i>m/z</i> ] = 277 | Relative abundance [%]<br><i>n</i> = 3 |           | Difference [%] | Max. tolerated:<br>Win-<br>dow<br>±5<br>(ref-<br>erence) |
|----------------|------------------------------------|----------------------------------------|-----------|----------------|----------------------------------------------------------|
|                |                                    | Sample                                 | Reference |                |                                                          |
| 1              | → 203                              | 100                                    | 100       | 0.36           | >0–                                                      |
|                | → 132.1                            | 4.96                                   | 4.63      |                | 9.63%                                                    |
| 2              | → 203                              | 100                                    | 100       | 1.06           | >0–                                                      |
|                | → 132.1                            | 5.69                                   | 4.63      |                | 9.63%                                                    |
| 3              | → 203                              | 100                                    | 100       | 0.6            | >0–                                                      |
|                | → 132.1                            | 4.03                                   | 4.63      |                | 9.63%                                                    |
| 4              | → 203                              | 100                                    | 100       | 1.24           | >0–                                                      |
|                | → 132.1                            | 5.87                                   | 4.63      |                | 9.63%                                                    |
| 5              | → 203                              | 100                                    | 100       | 0.24           | >0–                                                      |
|                | → 132.1                            | 4.87                                   | 4.63      |                | 9.63%                                                    |
| 6              | → 203                              | 100                                    | 100       | 0.28           | >0–                                                      |
|                | → 132.1                            | 4.91                                   | 4.63      |                | 9.63%                                                    |
| 7              | → 203                              | 100                                    | 100       | 0.75           | >0–                                                      |
|                | → 132.1                            | 5.38                                   | 4.63      |                | 9.63%                                                    |
| 8              | → 203                              | 100                                    | 100       | 0.39           | >0–                                                      |
|                | → 132.1                            | 5.02                                   | 4.63      |                | 9.63%                                                    |
| 9              | → 203                              | 100                                    | 100       | 0.1            | >0–                                                      |
|                | → 132.1                            | 4.73                                   | 4.63      |                | 9.63%                                                    |
| 10             | → 203                              | 100                                    | 100       | 2.16           | >0–                                                      |
|                | → 132.1                            | 6.89                                   | 4.63      |                | 9.63%                                                    |

**Table S9.** Precision (%RSD) and accuracy (%RE) of the developed SPE–UHPLC–MS/MS method from analysis of blinded samples in Surine™.

| Blinded Sample | Nominal [ng/mL] | Found [ng/mL] | RSD [%]<br><i>n</i> = 3 | RE [%]<br><i>n</i> = 3 |
|----------------|-----------------|---------------|-------------------------|------------------------|
| 1              | 2               | 1.99          | 0.56                    | 0                      |
| 2              | 40              | 38.75         | 1.87                    | -3                     |
| 3              | 1               | 0.99          | 3.10                    | -1                     |
| 4              | 2.5             | 2.71          | 0.64                    | -8                     |
| 5              | 0.5             | 0.57          | 0.36                    | -12                    |
| 6              | 5               | 5.60          | 0.92                    | -11                    |
| 7              | 0.2             | 0.22          | 1.21                    | -9                     |
| 8              | 1.25            | 1.21          | 1.77                    | -3                     |
| 9              | 50              | 51.64         | 0.85                    | -3                     |
| 10             | 12.5            | 13.34         | 0.46                    | -6                     |

RSD—relative standard deviation; RE—relative error

**Table S10.** Precision (%RSD) and accuracy (%RE) of the developed SPE–UHPLC–MS/MS method from analysis of blinded samples in urine.

| Blinded Sample | Nominal [ng/mL] | Found [ng/mL] | RSD [%]<br><i>n</i> = 3 | RE [%]<br><i>n</i> = 3 |
|----------------|-----------------|---------------|-------------------------|------------------------|
| 1              | 10              | 10.02         | 1.34                    | 0                      |
| 2              | 2               | 2.05          | 0.67                    | -2                     |
| 3              | 0.5             | 0.48          | 0.97                    | -4                     |
| 4              | 12.5            | 12.63         | 1.33                    | -1                     |
| 5              | 1.25            | 1.18          | 0.69                    | -6                     |
| 6              | 1               | 1.07          | 5.40                    | -7                     |
| 7              | 50              | 48.95         | 0.31                    | -2                     |
| 8              | 0.2             | 0.21          | 2.75                    | -5                     |
| 9              | 2.5             | 2.48          | 0.17                    | -1                     |
| 10             | 0.4             | 0.45          | 1.29                    | -11                    |

RSD—relative standard deviation; RE—relative error
